# Supplementary material for: Root Exposure to 5-Aminolevulinic Acid (ALA) Affects Leaf Element Accumulation, Isoprene Emission, Phytohormonal Balance, and Photosynthesis of Salt-Stressed Arundo donax
Source: MDPI journal article supplement (doi:10.3390/ijms23084311), 2022-04-13
Supplement: s1 [file s1]

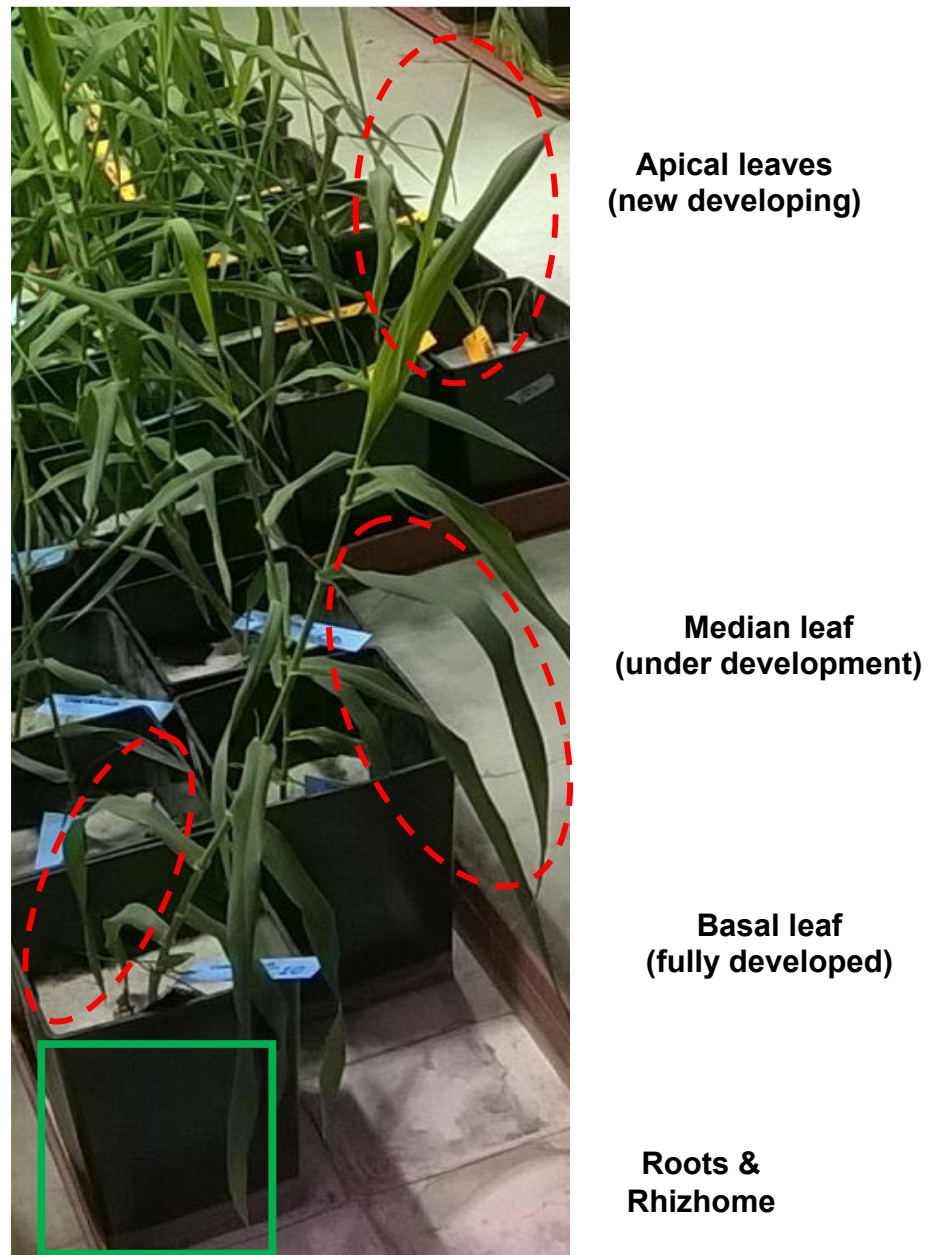

Figure S1 - Picture of *Arundo donax* plant profile indicating the position of apical, median and basal leaves, as well as the pot containing the roots and the rhizome.

|                    | Na <sup>+</sup>          |                           |                          |                          | Ca <sup>+2</sup>         |                          |                           |                          | K <sup>+</sup>              |                             |                             |                             |
|--------------------|--------------------------|---------------------------|--------------------------|--------------------------|--------------------------|--------------------------|---------------------------|--------------------------|-----------------------------|-----------------------------|-----------------------------|-----------------------------|
|                    | CTR                      | Na                        | ALA                      | Na + ALA                 | CTR                      | Na                       | ALA                       | Na + ALA                 | CTR                         | Na                          | ALA                         | Na + ALA                    |
| <i>T0</i>          |                          |                           |                          |                          |                          |                          |                           |                          |                             |                             |                             |                             |
| <i>Apical leaf</i> | n.d.                     | ---                       | ---                      | ---                      | 2562.4 ±<br>391.8<br>AC  | ---                      | ---                       | ---                      | 49935.5 ±<br>3202.4<br>B    | ---                         | ---                         | ---                         |
| <i>Median leaf</i> | n.d.                     | ---                       | ---                      | ---                      | 3846.3 ±<br>169.4<br>A   | ---                      | ---                       | ---                      | 45057.1 ±<br>4983.2<br>B    | ---                         | ---                         | ---                         |
| <i>Basal leaf</i>  | n.d.                     | ---                       | ---                      | ---                      | 4068.9 ±<br>498.8<br>A   | ---                      | ---                       | ---                      | 44195.7 ±<br>4758.8<br>B    | ---                         | ---                         | ---                         |
| <i>Stems</i>       | ---                      | ---                       | ---                      | ---                      | 1347.8 ±<br>147.2<br>C   | ---                      | ---                       | ---                      | 57691.9 ±<br>1455.8<br>A    | ---                         | ---                         | ---                         |
| <i>Roots</i>       | 7459.7 ±<br>831.4<br>A   | ---                       | ---                      | ---                      | 1907.3 ±<br>568.2<br>C   | ---                      | ---                       | ---                      | 14923.5 ±<br>748.1<br>C     | ---                         | ---                         | ---                         |
| <i>Rhizome</i>     | 1359.6 ±<br>879.1<br>B   | ---                       | ---                      | ---                      | 544.2 ±<br>37.0<br>BC    | ---                      | ---                       | ---                      | 14816.0 ±<br>985.3<br>C     | ---                         | ---                         | ---                         |
| <i>T2</i>          |                          |                           |                          |                          |                          |                          |                           |                          |                             |                             |                             |                             |
| <i>Apical leaf</i> | ----                     | 9024.3 ±<br>500.5<br>C a  | ---                      | 4520.4 ±<br>857.0<br>B b | 2735.7 ±<br>337.4<br>D b | 6364.2 ±<br>667.1<br>A a | 1844.8 ±<br>669.8<br>BC b | 6957.7 ±<br>71.3<br>C a  | 42085.8 ±<br>1747.3<br>C a  | 37007.5 ±<br>3700.1<br>C a  | 34626.1 ±<br>1567.8<br>A a  | 33428.0 ±<br>876.8<br>AC a  |
| <i>Median leaf</i> | 1284.5 ±<br>189.7<br>B b | 6756.9 ±<br>146.5<br>CD a | 1392.8 ±<br>399.9<br>A b | 5540.5 ±<br>833.7<br>B a | 7153.8 ±<br>373.5<br>C a | 6382.5 ±<br>198.1<br>A a | 7957.1 ±<br>917.6<br>A a  | 7975.0 ±<br>218.6<br>C b | 42722.8 ±<br>4559.2<br>C a  | 43068.0 ±<br>3385.8<br>AC a | 45338.0 ±<br>1957.3<br>A a  | 36827.2 ±<br>3612.2<br>AC a |
| <i>Basal leaf</i>  | 3939.4 ±<br>644.5<br>B b | 8829.3 ±<br>501.8<br>C a  | 2464.7 ±<br>623.4<br>A b | 4055.1 ±<br>538.3<br>B b | 8957.3 ±<br>268.5<br>A a | 5438.0 ±<br>594.3<br>A b | 9112.6 ±<br>1022.5<br>A a | 9006.5 ±<br>780.8<br>A a | 36123.7 ±<br>2733.5<br>AC a | 44650.0 ±<br>1204.9<br>C a  | 40931.5 ±<br>4316.4<br>A a  | 40695.9 ±<br>5596.7<br>AC a |
| <i>Stems</i>       | ---                      | 4993.6 ±<br>647.1<br>D a  | 1108.6 ±<br>789.7<br>A b | 2171.9 ±<br>909.6<br>B b | 612.7 ±<br>106.2<br>B a  | 294.1 ±<br>19.9<br>B b   | 613.8 ±<br>33.5<br>B a    | 566.3 ± 5.2<br>B a       | 40147.6 ±<br>2495.5<br>C a  | 48749.5 ±<br>1270.7<br>AC a | 33184.9 ±<br>1737.0<br>AC a | 43448.5 ±<br>3982.4<br>A a  |

|          |                    |                           |                            |                           |                            |                           |                          |                           |                          |                             |                            |                             |                             |
|----------|--------------------|---------------------------|----------------------------|---------------------------|----------------------------|---------------------------|--------------------------|---------------------------|--------------------------|-----------------------------|----------------------------|-----------------------------|-----------------------------|
|          | <i>Roots</i>       | 8194.6 ±<br>1406.9<br>A c | 21242.5<br>± 848.7<br>A d  | 2562.3 ±<br>91.0<br>A b   | 33302.6 ±<br>1601.8<br>A a | 2874.9 ±<br>14.0<br>D a   | 2615.0 ±<br>425.9<br>C a | 1240.3 ±<br>336.2<br>BC b | 945.0 ±<br>114.0<br>B b  | 19114.0 ±<br>662.4<br>B a   | 6402.6 ±<br>300.0<br>B b   | 21957.1 ±<br>2225.0<br>B a  | 9716.5 ±<br>1716.1<br>B b   |
|          | <i>Rhizome</i>     | 2966.6 ±<br>696.5<br>B b  | 12264.9<br>± 740.5<br>B c  | 2658.8 ±<br>751.4<br>A b  | 19445.8 ±<br>1879.8<br>C a | 3979.1 ±<br>123.4<br>D a  | 753.8 ± 9.4<br>C b       | 333.6 ±<br>99.1<br>C b    | 505.4 ±<br>112.1<br>B b  | 9290.7 ±<br>506.4<br>B b    | 9294.1 ±<br>510.0<br>B b   | 13129.4 ±<br>31.2<br>B b    | 27059.3 ±<br>2394.5<br>C a  |
| <i>R</i> | <i>Apical leaf</i> | n.d.                      | 2474.3 ±<br>360.5<br>B     | n.d.                      | n.d.                       | 1547.9 ±<br>472.7<br>B a  | 509.6 ±<br>44.9<br>BC a  | 709.6 ±<br>145.2<br>B a   | 686.4 ±<br>82.8<br>B a   | 44218.9 ±<br>4197.2<br>A a  | 43342.0 ±<br>2866.4<br>A a | 41991.9 ±<br>5897.4<br>A a  | 44963.7 ±<br>2322.8<br>AC a |
|          | <i>Median leaf</i> | 5381.8 ±<br>676.1<br>C bc | 14516.9<br>± 1207.0<br>C a | 2376.4 ±<br>190.3<br>B b  | 6910.2 ±<br>19.9<br>B c    | 5986.7 ±<br>306.4<br>C ab | 4566.4 ±<br>228.5<br>A b | 4033.5 ±<br>504.6<br>A b  | 8209.3 ±<br>921.5<br>A a | 26564.5 ±<br>2258.2<br>BC a | 32623.4 ±<br>2279.8<br>A a | 29241.0 ±<br>2792.3<br>A a  | 30334.2 ±<br>4782.8<br>AC a |
|          | <i>Basal leaf</i>  | 6174.6 ±<br>599.5<br>C a  | ---                        | 4344.7 ±<br>440.9<br>B a  | ---                        | 8875.4 ±<br>268.5<br>A a  | ---                      | 5212.6 ±<br>295.8<br>A b  | ---                      | 35033.3 ±<br>3236.0<br>AC a | ---                        | 30423.2 ±<br>4554.9<br>AB a | ---                         |
|          | <i>Stems</i>       | 896.5 ±<br>127.8<br>B b   | 929.3 ±<br>304.4<br>B a    | ---                       | 4051.6 ±<br>521.2<br>B a   | 437.7 ±<br>60.8<br>B a    | 520.3 ±<br>127.4<br>BC a | 367.1 ±<br>41.2<br>B a    | 437.1 ±<br>53.7<br>B a   | 18152.1 ±<br>3519.2<br>B a  | 36080.7 ±<br>3643.2<br>A a | 21176.8 ±<br>3701.0<br>B a  | 35405.5 ±<br>2822.7<br>A a  |
|          | <i>Roots</i>       | 8424.7 ±<br>739.7<br>A b  | 22414.7<br>± 516.1<br>A a  | 2170.1 ±<br>2037<br>B c   | 29668.1 ±<br>2631.9<br>A a | 3780.4 ±<br>550.6<br>D a  | 1348.6 ±<br>297.7<br>B b | 1685.6 ±<br>376.7<br>B b  | 1100.2 ±<br>355.6<br>B b | 25488.5 ±<br>2683.7<br>BC a | 16046.3 ±<br>3319.8<br>B a | 17599.3 ±<br>252.8<br>B a   | 15640.5 ±<br>2206.9<br>BC a |
|          | <i>Rhizome</i>     | 3787.4 ±<br>877.7<br>BC c | 17292.1<br>± 627.7<br>C a  | 6380.8 ±<br>1004.1<br>A a | 14264.2 ±<br>1360.7<br>C a | 4666.6 ±<br>15.5<br>B a   | 349.2 ±<br>121.9<br>C b  | 427.5 ±<br>39.9<br>B b    | 609.9 ±<br>165.3<br>B b  | 13322.8 ±<br>823.0<br>B a   | 11150.6 ±<br>890.5<br>B a  | 15472.7 ±<br>2680.0<br>B a  | 10781.1 ±<br>4243.2<br>B a  |

Table S1 – Concentration ( $\mu\text{g} / \text{g}$ ) of mineral elements ( $\text{Na}^+$ ;  $\text{Ca}^{+2}$ ;  $\text{K}^+$ ) measured at different time points (T0, T2 and R) in the apical, median, and basal leaves as well as in stems, roots and rhizome of *Arundo donax* controls (CTR), salt-stressed (Na), ALA-treated (ALA) and both salt-stressed and ALA-treated (Na + ALA) plants. Mean values  $\pm$  SE are shown. At any time point, uppercase letters indicate statistically significant differences between (apical, median and basal) leaves, roots and rhizome of

plants undergoing the same treatment; lowercase letters indicate statistically significant differences between the (apical, median and basal) leaves, roots and rhizome of plants undergoing different treatments ( $P < 0.05$ ;  $n = 3$ ).

|                              | A ( $\mu\text{mol m}^{-2} \text{s}^{-1}$ ) |                       |                        |                       | gs ( $\mu\text{mol m}^{-2} \text{s}^{-1}$ ) |                        |                         |                        | Ci (ppm)          |                  |                  |                   |
|------------------------------|--------------------------------------------|-----------------------|------------------------|-----------------------|---------------------------------------------|------------------------|-------------------------|------------------------|-------------------|------------------|------------------|-------------------|
|                              | CTR                                        | Na                    | ALA                    | Na + ALA              | CTR                                         | Na                     | ALA                     | Na + ALA               | CTR               | Na               | ALA              | Na + ALA          |
| <i>T0</i>                    | 21.35 $\pm$ 0.96 A                         | ---                   | ---                    | ---                   | 0.262 $\pm$ 0.028 A                         | ---                    | ---                     | ---                    | 228 $\pm$ 9 A     | ---              | ---              | ---               |
| <i>1<sup>st</sup></i> apical | 26.33 $\pm$ 0.89 A                         | ---                   | ---                    | ---                   | 0.328 $\pm$ 0.034 A                         | ---                    | ---                     | ---                    | 248 $\pm$ 8 A     | ---              | ---              | ---               |
| <i>2<sup>nd</sup></i> apical | 22.37 $\pm$ 1.10 A                         | ---                   | ---                    | ---                   | 0.291 $\pm$ 0.029 AB                        | ---                    | ---                     | ---                    | 235 $\pm$ 10 A    | ---              | ---              | ---               |
| <i>median</i>                | 15.83 $\pm$ 1.53 B                         | ---                   | ---                    | ---                   | 0.176 $\pm$ 0.030 B                         | ---                    | ---                     | ---                    | 203 $\pm$ 14 A    | ---              | ---              | ---               |
| <i>basal</i>                 | 21.86 $\pm$ 1.37 A a                       | 18.28 $\pm$ 0.71 A a  | 21.50 $\pm$ 1.77 A a   | 18.93 $\pm$ 1.39 A a  | 0.327 $\pm$ 0.076 A a                       | 0.183 $\pm$ 0.015 A b  | 0.202 $\pm$ 0.018 AC a  | 0.168 $\pm$ 0.016 A a  | 248 $\pm$ 31 A a  | 202 $\pm$ 12 A a | 244 $\pm$ 9 A a  | 188 $\pm$ 5 A a   |
| <i>T1</i>                    | 24.33 $\pm$ 2.26 A a                       | 19.42 $\pm$ 0.95 A a  | 22.00 $\pm$ 1.29 A a   | 19.32 $\pm$ 1.99 A a  | 0.359 $\pm$ 0.078 A a                       | 0.183 $\pm$ 0.018 A b  | 0.227 $\pm$ 0.016 A a   | 0.197 $\pm$ 0.033 A a  | 246 $\pm$ 40 A a  | 197 $\pm$ 13 A a | 250 $\pm$ 15 A a | 207 $\pm$ 18 A a  |
| <i>1<sup>st</sup></i> apical | 20.18 $\pm$ 1.19 AB a                      | 14.93 $\pm$ 1.89 AB a | 17.75 $\pm$ 1.97 AB ab | 12.51 $\pm$ 0.40 B b  | 0.263 $\pm$ 0.066 A a                       | 0.123 $\pm$ 0.022 AB b | 0.134 $\pm$ 0.014 BC ab | 0.076 $\pm$ 0.009 B b  | 234 $\pm$ 25 A ab | 172 $\pm$ 14 A b | 245 $\pm$ 10 A a | 176 $\pm$ 10 A ab |
| <i>2<sup>nd</sup></i> apical | 13.22 $\pm$ 2.41 B a                       | 9.88 $\pm$ 0.91 B a   | 12.34 $\pm$ 0.87 B a   | 7.50 $\pm$ 1.02 B a   | 0.128 $\pm$ 0.026 A a                       | 0.079 $\pm$ 0.005 B b  | 0.100 $\pm$ 0.022 B a   | 0.081 $\pm$ 0.006 B a  | 207 $\pm$ 2 A a   | 176 $\pm$ 22 A a | 207 $\pm$ 9 A a  | 136 $\pm$ 32 A a  |
| <i>median</i>                | 19.90 $\pm$ 1.00 AC a                      | 7.89 $\pm$ 0.54 A b   | 17.90 $\pm$ 1.06 A a   | 10.97 $\pm$ 0.52 A a  | 0.209 $\pm$ 0.025 A a                       | 0.061 $\pm$ 0.004 A b  | 0.225 $\pm$ 0.026 A a   | 0.093 $\pm$ 0.009 C c  | 215 $\pm$ 13 A ac | 171 $\pm$ 3 A b  | 239 $\pm$ 9 A a  | 185 $\pm$ 9 A bc  |
| <i>T2</i>                    | 22.03 $\pm$ 1.05 A a                       | 8.00 $\pm$ 0.85 A c   | 18.06 $\pm$ 0.87 A a   | 12.79 $\pm$ 0.67 A b  | 0.229 $\pm$ 0.022 A a                       | 0.070 $\pm$ 0.008 A b  | 0.209 $\pm$ 0.020 A a   | 0.134 $\pm$ 0.007 A c  | 212 $\pm$ 18 A a  | 194 $\pm$ 10 A a | 229 $\pm$ 9 A a  | 208 $\pm$ 7 A a   |
| <i>1<sup>st</sup></i> apical | 15.60 $\pm$ 1.22 C a                       | 6.94 $\pm$ 0.94 A b   | 15.02 $\pm$ 1.65 A a   | 8.06 $\pm$ 0.75 B b   | 0.151 $\pm$ 0.020 AB ac                     | 0.058 $\pm$ 0.008 A b  | 0.177 $\pm$ 0.032 AB a  | 0.072 $\pm$ 0.006 BC c | 205 $\pm$ 11 A a  | 188 $\pm$ 10 A a | 230 $\pm$ 12 A a | 198 $\pm$ 6 A a   |
| <i>2<sup>nd</sup></i> apical | 7.90 $\pm$ 0.70 B a                        | 6.35 $\pm$ 0.98 A a   | 9.23 $\pm$ 0.32 B a    | 6.61 $\pm$ 0.32 B a   | 0.068 $\pm$ 0.012 B ab                      | 0.057 $\pm$ 0.008 A b  | 0.100 $\pm$ 0.009 B a   | 0.055 $\pm$ 0.004 B b  | 187 $\pm$ 22 A a  | 200 $\pm$ 7 A a  | 226 $\pm$ 10 A a | 186 $\pm$ 7 A a   |
| <i>median</i>                | 14.50 $\pm$ 1.54 A a                       | 18.50 $\pm$ 0.31 AB a | 17.68 $\pm$ 0.46 A a   | 17.38 $\pm$ 0.63 A a  | 0.171 $\pm$ 0.034 A a                       | 0.202 $\pm$ 0.018 AC a | 0.180 $\pm$ 0.010 A a   | 0.192 $\pm$ 0.010 A a  | 237 $\pm$ 11 A a  | 222 $\pm$ 11 A a | 214 $\pm$ 7 A a  | 227 $\pm$ 7 A a   |
| <i>R</i>                     | 16.93 $\pm$ 2.09 A a                       | 19.58 $\pm$ 0.97 A a  | 14.95 $\pm$ 1.10 AC a  | 17.53 $\pm$ 1.09 A a  | 0.207 $\pm$ 0.034 A a                       | 0.227 $\pm$ 0.016 A a  | 0.146 $\pm$ 0.020 A a   | 0.194 $\pm$ 0.020 A a  | 242 $\pm$ 6 A a   | 233 $\pm$ 6 A ab | 209 $\pm$ 7 A b  | 226 $\pm$ 6 A ab  |
| <i>1<sup>st</sup></i> apical | 11.90 $\pm$ 0.36 AB a                      | 11.81 $\pm$ 2.63 BC a | 11.20 $\pm$ 0.98 BC a  | 13.73 $\pm$ 0.68 AB a | 0.128 $\pm$ 0.007 A a                       | 0.134 $\pm$ 0.014 BC a | 0.102 $\pm$ 0.014 AB a  | 0.145 $\pm$ 0.008 AB a | 230 $\pm$ 6 A ab  | 237 $\pm$ 8 A a  | 200 $\pm$ 10 A b | 224 $\pm$ 5 A ab  |
| <i>2<sup>nd</sup></i> apical | 6.71 $\pm$ 0.77 B a                        | 9.19 $\pm$ 1.81 C a   | 8.05 $\pm$ 1.10 B a    | 10.21 $\pm$ 1.02 B a  | 0.064 $\pm$ 0.064 A a                       | 0.100 $\pm$ 0.020 B a  | 0.063 $\pm$ 0.022 B a   | 0.102 $\pm$ 0.010 B a  | 215 $\pm$ 3 A a   | 228 $\pm$ 7 A a  | 200 $\pm$ 11 A a | 214 $\pm$ 9 A a   |
| <i>median</i>                |                                            |                       |                        |                       |                                             |                        |                         |                        |                   |                  |                  |                   |
| <i>basal</i>                 |                                            |                       |                        |                       |                                             |                        |                         |                        |                   |                  |                  |                   |

Table S2 – Photosynthetic CO<sub>2</sub> assimilation arte (A); stomatal conductance (gs), intercellular CO<sub>2</sub> concentration (Ci) measured at different time points (T0, T1, T2 and R) in (1<sup>st</sup>, 2<sup>nd</sup>) apical, median and basal leaves of *Arundo donax* controls (CTR), salt-

stressed (Na), ALA-treated (ALA) and both salt-stressed and ALA-treated (Na + ALA) plants. Mean values  $\pm$  SE are shown. At any time point, uppercase letters indicate statistically significant differences between (apical, median and basal) leaves of plants undergoing the same treatment, and lowercase letters indicate statistically significant differences between (apical, median and basal) leaves of plants undergoing different treatments ( $P < 0.05$ ;  $n = 3$ ).

|               | CTR                | Na <sup>+</sup>     | ALA                 | Na <sup>+</sup> + ALA |
|---------------|--------------------|---------------------|---------------------|-----------------------|
| <i>T0</i>     |                    |                     |                     |                       |
| <i>apical</i> | 1.47 ± 0.21<br>A   | ---                 | ---                 | ---                   |
| <i>median</i> | 1.64 ± 0.01<br>A   | ---                 | ---                 | ---                   |
| <i>basal</i>  | ---                | ---                 | ---                 | ---                   |
| <i>T2</i>     |                    |                     |                     |                       |
| <i>apical</i> | 0.87 ± 0.05<br>B a | 0.91 ± 0.16<br>A a  | 0.83 ± 0.08<br>A a  | 0.83 ± 0.07<br>A a    |
| <i>median</i> | 1.38 ± 0.03<br>A a | 0.82 ± 0.09<br>A b  | 1.28 ± 0.11<br>A a  | 0.87 ± 0.08<br>A b    |
| <i>basal</i>  | 1.30 ± 0.08<br>A a | ---                 | 1.27 ± 0.18<br>A a  | ---                   |
| <i>R</i>      |                    |                     |                     |                       |
| <i>apical</i> | 0.86 ± 0.05<br>B b | 0.89 ± 0.03<br>B bc | 1.08 ± 0.01<br>A a  | 0.75 ± 0.03<br>B b    |
| <i>median</i> | 1.33 ± 0.06<br>A a | 1.14 ± 0.03<br>A ab | 1.14 ± 0.09<br>A ab | 0.88 ± 0.03<br>A b    |
| <i>basal</i>  | 0.82 ± 0.05<br>B a | ---                 | 0.93 ± 0.08<br>A a  | ---                   |

Table S3 – Total chlorophylls concentration (mg / g) measured at different time points (T0, T2 and R) in apical, median and basal leaves of *Arundo donax* controls (CTR), salt-stressed (Na), ALA-treated (ALA) and both salt-stressed and ALA-treated (Na + ALA) plants. Mean values ± SE are shown. At any time point, uppercase letters indicate statistically significant differences between (apical, median and basal) leaves of plants undergoing the same treatment, and lowercase letters indicate statistically significant differences between (apical, median and basal) leaves of plants undergoing different treatments ( $P < 0.05$ ;  $n = 3$ ).

|                        | Methanol (nmol m <sup>-2</sup> s <sup>-1</sup> ) |           |           |           | Isoprene (μmol m <sup>-2</sup> s <sup>-1</sup> ) |           |           |           |
|------------------------|--------------------------------------------------|-----------|-----------|-----------|--------------------------------------------------|-----------|-----------|-----------|
|                        | CTR                                              | Na        | ALA       | Na + ALA  | CTRL                                             | Na        | ALA       | Na + ALA  |
| <i>T0</i>              | 6.70 ±                                           |           |           |           | 2.47 ±                                           |           |           |           |
| 1 <sup>st</sup> apical | 1.22 A                                           | ---       | ---       | ---       | 0.43 B                                           | ---       | ---       | ---       |
| 2 <sup>nd</sup> apical | 3.27 ±                                           |           |           |           | 7.33 ±                                           |           |           |           |
|                        | 0.60 B                                           | ---       | ---       | ---       | 1.25 C                                           | ---       | ---       | ---       |
| median                 | 1.39 ±                                           |           |           |           | 12.59 ±                                          |           |           |           |
|                        | 0.12 B                                           | ---       | ---       | ---       | 1.16 A                                           | ---       | ---       | ---       |
| basal                  | 0.84 ±                                           |           |           |           | 9.09 ±                                           |           |           |           |
|                        | 0.15 B                                           | ---       | ---       | ---       | 1.02 AC                                          | ---       | ---       | ---       |
| <i>T1</i>              | 3.06 ±                                           | 1.98 ±    | 4.22 ±    | 1.11 ±    | 7.69 ±                                           | 11.57 ±   | 2.97 ±    | 11.07 ±   |
| 1 <sup>st</sup> apical | 0.59 A a                                         | 0.79 A b  | 1.19 A a  | 0.15 A a  | 3.45 B a                                         | 3.02 A a  | 0.81 B b  | 1.74 A a  |
| 2 <sup>nd</sup> apical | 1.65 ±                                           | 0.93 ±    | 2.33 ±    | 1.04 ±    | 20.86 ±                                          | 14.57 ±   | 7.06 ±    | 16.72 ±   |
|                        | 0.23 B ab                                        | 0.29 A b  | 0.15 AB a | 0.03 A b  | 4.18 A a                                         | 3.09 A ab | 1.78 AB b | 3.29 A ab |
| median                 | 1.58 ±                                           | 0.53 ±    | 1.17 ±    | 0.80 ±    | 18.87 ±                                          | 11.87 ±   | 9.81 ±    | 11.34 ±   |
|                        | 0.15 B a                                         | 0.19 A a  | 0.22 B a  | 0.54 A a  | 5.29 A a                                         | 1.69 A a  | 2.37 AB b | 4.35 A a  |
| basal                  | 0.94 ±                                           | 0.73 ±    | 0.87 ±    | 1.06 ±    | 7.84 ±                                           | 7.57 ±    | 9.11 ±    | 6.86 ±    |
|                        | 0.21 B a                                         | 0.41 A a  | 0.32 B a  | 0.19 A a  | 1.98 A a                                         | 2.22 A a  | 1.30 A b  | 1.39 A a  |
| <i>T2</i>              | 4.29 ±                                           | 1.56 ±    | 3.95 ±    | 0.99 ±    | 8.89 ±                                           | 7.84 ±    | 2.43 ±    | 15.23 ±   |
| 1 <sup>st</sup> apical | 3.29 A a                                         | 0.71 A b  | 0.74 A a  | 0.29 A a  | 3.64 A a                                         | 1.89 A a  | 0.61 B b  | 4.49 A a  |
| 2 <sup>nd</sup> apical | 1.45 ±                                           | 0.78 ±    | 1.63 ±    | 0.89 ±    | 11.83 ±                                          | 8.71 ±    | 7.38 ±    | 18.44 ±   |
|                        | 0.43 A a                                         | 0.29 A b  | 0.12 B a  | 0.16 A a  | 2.96 A b                                         | 1.06 A b  | 1.52 B b  | 3.95 A a  |
| median                 | 0.81 ±                                           | 0.66 ±    | 0.94 ±    | 0.82 ±    | 16.61 ±                                          | 7.48 ±    | 15.24 ±   | 15.54 ±   |
|                        | 0.10 A a                                         | 0.14 A a  | 0.21 B a  | 0.23 A a  | 1.27 A a                                         | 1.14 A b  | 2.50 A a  | 3.21 A a  |
| basal                  | 0.14 ±                                           | 0.56 ±    | 0.61 ±    | 0.51 ±    | 9.92 ±                                           | 4.60 ±    | 7.60 ±    | 10.53 ±   |
|                        | 0.12 A b                                         | 0.07 A ab | 0.10 B a  | 0.10 A ab | 1.38 A ab                                        | 1.03 A b  | 0.96 B ab | 1.86 A a  |
| <i>R</i>               | 2.26 ±                                           | 1.93 ±    | 1.64 ±    | 1.80 ±    | 3.88 ±                                           | 6.00 ±    | 10.77 ±   | 6.17 ±    |
| 1 <sup>st</sup> apical | 0.16 A a                                         | 0.67 A a  | 0.23 A a  | 0.36 A a  | 1.58 B a                                         | 1.69 B a  | 3.56 A a  | 2.19 B a  |
| 2 <sup>nd</sup> apical | 0.94 ±                                           | 1.46 ±    | 0.74 ±    | 1.17 ±    | 14.15 ±                                          | 10.06 ±   | 13.24 ±   | 6.07 ±    |
|                        | 0.26 B a                                         | 0.27 A a  | 0.13 B a  | 0.11 AB a | 3.74 AB a                                        | 1.72 AB a | 3.12 A a  | 0.90 B a  |
| median                 | 0.41 ±                                           | 1.01 ±    | 0.30 ±    | 0.39 ±    | 26.22 ±                                          | 15.06 ±   | 18.24 ±   | 18.99 ±   |
|                        | 0.20 B a                                         | 0.34 A a  | 0.06 B a  | 0.14 B a  | 4.72 A a                                         | 3.65 AB a | 2.25 A a  | 1.27 A a  |
| basal                  | 0.80 ±                                           | 0.50 ±    | 0.31 ±    | 0.42 ±    | 18.02 ±                                          | 17.10 ±   | 16.26 ±   | 17.46 ±   |
|                        | 0.16 B a                                         | 0.15 A a  | 0.06 B a  | 0.08 B a  | 0.30 A a                                         | 2.46 A a  | 1.67 A a  | 2.74 A a  |

Table S4 – Emission of methanol and isoprene measured at different time points (T0, T1, T2 and R) in (1<sup>st</sup>, 2<sup>nd</sup>) apical, median and basal leaves of *Arundo donax* controls (CTR), salt-stressed (Na), ALA-treated (ALA) and both salt-stressed and ALA-treated (Na + ALA) plants. Mean values ± SE are shown. At any time point, uppercase letters indicate statistically significant differences between (apical, median and basal) leaves of plants undergoing the same treatment, and lowercase letters indicate statistically significant differences between (apical, median and basal) leaves of plants undergoing different treatments ( $P < 0.05$ ;  $n = 3$ ).



|                             | callose<br>( $\mu\text{g} / \text{g}$ ) |
|-----------------------------|-----------------------------------------|
| <b>CTR</b>                  | 45.70 $\pm$ 5.24 c                      |
| <b>Na<sup>+</sup></b>       | 145.52 $\pm$ 5.36 a                     |
| <b>ALA</b>                  | 47.44 $\pm$ 2.25 c                      |
| <b>Na<sup>+</sup> + ALA</b> | 10.38 $\pm$ 1.28 b                      |

Table S5 – Callose concentration measured in roots of *Arundo donax* controls (CTR), salt-stressed (Na), ALA-treated (ALA) and both salt-stressed and ALA-treated (Na + ALA) after the application of salt stress (at T2). Mean values  $\pm$  SE are shown and lowercase letters indicate statistically significant differences between plants undergoing different treatments ( $P < 0.05$ ; n = 3).
